# Supplementary material for: Decelerated degradation of a sulfonylurea herbicide in four fungicide-treated soils
Source: Royal Society of Chemistry journal article supplement (doi:10.1039/d1va00021g), 2022-01-01
Supplement: d1va00021g1.pdf [file d1va00021g1.pdf]

## Decelerated Degradation of a Sulfonylurea Herbicide in Four Fungicide-Treated Soils

**Christiaan Wijntjes<sup>1,2,§</sup>, Yanik Weber<sup>2</sup>, Stefan Höger<sup>2</sup>, Kim Thu Nguyen<sup>1</sup>, Henner  
Hollert<sup>3</sup> and Andreas Schäffer<sup>1</sup>**

<sup>1</sup>Institute for Environmental Research, RWTH Aachen University, Worringerweg 1,  
52074 Aachen, Germany

<sup>2</sup>Innovative Environmental Services (IES) Ltd, Benkenstrasse 260, 4108 Witterswil,  
Switzerland

<sup>3</sup>Institute of Ecology, Evolution and Diversity, Goethe University Frankfurt,  
Max-von-Laue-Strasse 13, 60438 Frankfurt am Main, Germany

### Supplementary Information

**§Corresponding author at:**

**Worringerweg 1**

**52074 Aachen**

**Germany**

**E-mail address:** christiaan.wijntjes@rwth-aachen.de

**Table S1:** Iodosulfuron-methyl-sodium and metabolites metsulfuron-methyl, AE F145740 and AE 0014966 (mean  $\pm$  standard deviation (SD)) recovered from soil samples (n = 3) treated with iodosulfuron-methyl-sodium only (controls, H), or with tebuconazole and prothioconazole (HF) 14 days prior to (dose 1), then on the same day as the herbicide treatment (day 0; dose 2), and again 5 days after application of radiolabeled iodosulfuron-methyl-sodium (dose 3). The samples were incubated under controlled aerobic conditions in the dark for up to 77 days at  $20 \pm 2$  °C.

| Degradation pattern<br>Mean $\pm$ SD (% AR) | Soil                           | Condition                      | Incubation time in days |                |                |                |                |                |                |                |                |
|---------------------------------------------|--------------------------------|--------------------------------|-------------------------|----------------|----------------|----------------|----------------|----------------|----------------|----------------|----------------|
|                                             |                                |                                | 0                       | 1              | 2              | 3              | 6              | 12             | 20             | 35             |                |
| <b>Iodosulfuron-methyl-sodium</b>           | Am Fischteich<br>Silt loam (1) | H                              |                         | 70.2 $\pm$ 0.6 | 50.4 $\pm$ 3.2 | 38.6 $\pm$ 4.3 | 17.4 $\pm$ 3.3 | 9.5 $\pm$ 2.6  | 3.0 $\pm$ 0.4  | 1.4 $\pm$ 0.1  |                |
|                                             |                                | HF                             | 86.9 $\pm$ 1.0          | 88.1 $\pm$ 0.5 | 76.8 $\pm$ 0.7 | 75.1 $\pm$ 3.3 | 39.2 $\pm$ 4.3 | 29.9 $\pm$ 5.3 | 10.5 $\pm$ 4.2 | 2.6 $\pm$ 0.4  |                |
|                                             | Bellevue<br>Silt loam (2)      | H                              |                         | 67.7 $\pm$ 2.4 | 57.5 $\pm$ 3.3 | 52.6 $\pm$ 4.1 | 36.7 $\pm$ 0.9 | 15.1 $\pm$ 1.6 | 14.0 $\pm$ 4.2 | 4.3 $\pm$ 0.3  |                |
|                                             |                                | HF                             | 91.6 $\pm$ 0.7          | 83.0 $\pm$ 4.4 | 79.8 $\pm$ 2.4 | 76.1 $\pm$ 2.4 | 57.4 $\pm$ 1.3 | 25.8 $\pm$ 3.2 | 19.5 $\pm$ 0.1 | 6.9 $\pm$ 2.5  |                |
|                                             | Speyer 2.1<br>Loamy sand       | H                              |                         | 81.4 $\pm$ 1.9 | 77.0 $\pm$ 1.0 | 67.7 $\pm$ 5.7 | 59.3 $\pm$ 3.7 | 59.2 $\pm$ 2.2 | 48.0 $\pm$ 1.2 | 29.5 $\pm$ 1.9 |                |
|                                             |                                | HF                             | 95.4 $\pm$ 1.2          | 88.7 $\pm$ 2.7 | 84.9 $\pm$ 1.3 | 80.4 $\pm$ 4.9 | 71.2 $\pm$ 2.3 | 71.2 $\pm$ 0.7 | 62.8 $\pm$ 3.7 | 51.0 $\pm$ 7.8 |                |
|                                             | Pavillion<br>Sandy loam        | H                              |                         | 76.4 $\pm$ 2.1 | 52.4 $\pm$ 2.9 | 33.4 $\pm$ 8.5 | 16.5 $\pm$ 6.1 | 3.0 $\pm$ 1.1  | 2.4 $\pm$ 1.5  | 2.8 $\pm$ 1.1  |                |
|                                             |                                | HF                             | 100.8 $\pm$ 1.7         | 85.4 $\pm$ 2.0 | 73.8 $\pm$ 3.4 | 44.7 $\pm$ 5.6 | 28.3 $\pm$ 2.9 | 13.0 $\pm$ 4.8 | 2.9 $\pm$ 1.0  | 2.1 $\pm$ 0.2  |                |
|                                             | <b>Metsulfuron-methyl</b>      | Am Fischteich<br>Silt loam (1) | H                       |                | 16.0 $\pm$ 1.6 | 27.0 $\pm$ 1.7 | 35.2 $\pm$ 2.3 | 42.8 $\pm$ 2.2 | 67.9 $\pm$ 2.5 | 43.7 $\pm$ 7.5 | 34.5 $\pm$ 2.7 |
|                                             |                                |                                | HF                      | 2.8 $\pm$ 0.3  | 5.0 $\pm$ 0.3  | 10.9 $\pm$ 0.7 | 13.5 $\pm$ 1.4 | 26.4 $\pm$ 2.9 | 51.1 $\pm$ 5.5 | 53.2 $\pm$ 5.6 | 37.3 $\pm$ 3.7 |
| Bellevue<br>Silt loam (2)                   |                                | H                              |                         | 22.3 $\pm$ 1.5 | 30.1 $\pm$ 2.9 | 33.0 $\pm$ 4.3 | 43.7 $\pm$ 1.3 | 57.4 $\pm$ 0.3 | 58.0 $\pm$ 6.4 | 42.7 $\pm$ 2.6 |                |
|                                             |                                | HF                             | 3.0 $\pm$ 0.1           | 5.1 $\pm$ 0.6  | 7.4 $\pm$ 0.2  | 12.4 $\pm$ 1.2 | 30.6 $\pm$ 1.3 | 53.9 $\pm$ 4.8 | 59.4 $\pm$ 0.2 | 48.2 $\pm$ 6.4 |                |
| Speyer 2.1<br>Loamy sand                    |                                | H                              |                         | 11.9 $\pm$ 1.0 | 10.8 $\pm$ 1.1 | 20.1 $\pm$ 6.8 | 24.5 $\pm$ 5.1 | 17.3 $\pm$ 1.9 | 25.5 $\pm$ 1.2 | 40.9 $\pm$ 2.1 |                |
|                                             |                                | HF                             | 4.3 $\pm$ 0.1           | 6.0 $\pm$ 1.1  | 7.8 $\pm$ 0.4  | 10.6 $\pm$ 3.8 | 14.3 $\pm$ 2.7 | 11.5 $\pm$ 0.4 | 14.8 $\pm$ 3.3 | 18.7 $\pm$ 8.3 |                |
| Pavillion<br>Sandy loam                     |                                | H                              |                         | 12.3 $\pm$ 1.5 | 35.6 $\pm$ 2.5 | 47.4 $\pm$ 3.9 | 62.2 $\pm$ 5.5 | 65.0 $\pm$ 0.8 | 62.5 $\pm$ 2.0 | 56.6 $\pm$ 0.4 |                |
|                                             |                                | HF                             | 2.4 $\pm$ 0.2           | 4.6 $\pm$ 0.3  | 19.0 $\pm$ 4.7 | 40.2 $\pm$ 4.2 | 51.6 $\pm$ 1.5 | 63.2 $\pm$ 3.1 | 67.4 $\pm$ 1.4 | 60.2 $\pm$ 3.9 |                |
| <b>AE F145740</b>                           |                                | Am Fischteich<br>Silt loam (1) | H                       |                | 7.1 $\pm$ 0.4  | 9.0 $\pm$ 0.4  | 8.0 $\pm$ 0.7  | 9.2 $\pm$ 1.0  | 5.4 $\pm$ 0.7  | 9.5 $\pm$ 1.1  | 6.2 $\pm$ 1.0  |
|                                             |                                |                                | HF                      | 6.2 $\pm$ 1.6  | 3.5 $\pm$ 0.5  | 7.5 $\pm$ 0.8  | 4.8 $\pm$ 0.6  | 14.0 $\pm$ 1.2 | 5.9 $\pm$ 0.9  | 5.5 $\pm$ 0.8  | 6.0 $\pm$ 0.7  |
|                                             | Bellevue<br>Silt loam (2)      | H                              |                         | 5.6 $\pm$ 0.5  | 5.6 $\pm$ 0.7  | 5.8 $\pm$ 1.2  | 6.3 $\pm$ 0.7  | 6.9 $\pm$ 0.3  | 6.4 $\pm$ 0.7  | 7.3 $\pm$ 0.9  |                |
|                                             |                                | HF                             | 4.1 $\pm$ 0.1           | 6.1 $\pm$ 2.5  | 5.1 $\pm$ 1.1  | 4.9 $\pm$ 1.4  | 5.8 $\pm$ 1.6  | 6.1 $\pm$ 1.4  | 4.9 $\pm$ 0.1  | 7.0 $\pm$ 0.5  |                |
|                                             | Speyer 2.1<br>Loamy sand       | H                              |                         | 5.1 $\pm$ 0.8  | 6.5 $\pm$ 1.4  | 7.8 $\pm$ 1.2  | 9.0 $\pm$ 2.0  | 10.3 $\pm$ 0.7 | 11.1 $\pm$ 0.4 | 9.9 $\pm$ 0.7  |                |
|                                             |                                | HF                             | 1.5 $\pm$ 0.1           | 3.0 $\pm$ 1.1  | 4.4 $\pm$ 0.7  | 7.9 $\pm$ 1.2  | 8.2 $\pm$ 2.6  | 8.6 $\pm$ 0.8  | 9.4 $\pm$ 1.1  | 10.6 $\pm$ 0.8 |                |
|                                             | Pavillion<br>Sandy loam        | H                              |                         | 4.8 $\pm$ 0.8  | 7.4 $\pm$ 0.2  | 8.0 $\pm$ 1.2  | 8.4 $\pm$ 0.5  | 7.2 $\pm$ 0.2  | 6.8 $\pm$ 0.3  | 7.5 $\pm$ 0.3  |                |
|                                             |                                | HF                             | 1.6 $\pm$ 0.2           | 3.2 $\pm$ 0.1  | 5.0 $\pm$ 0.5  | 6.9 $\pm$ 1.3  | 7.1 $\pm$ 0.3  | 6.8 $\pm$ 0.3  | 6.0 $\pm$ 0.2  | 6.7 $\pm$ 0.7  |                |
|                                             | <b>AE 0014966</b>              | Am Fischteich<br>Silt loam (1) | H                       |                | *              | *              | *              | 0.4 $\pm$ 0.6  | 2.8 $\pm$ 0.1  | 3.0 $\pm$ 1.0  | 20.6 $\pm$ 0.7 |
|                                             |                                |                                | HF                      | *              | *              | *              | *              | *              | 1.4 $\pm$ 0.1  | 3.7 $\pm$ 1.3  | 18.7 $\pm$ 0.4 |
| Bellevue<br>Silt loam (2)                   |                                | H                              |                         | 0.4 $\pm$ 0.7  | *              | *              | 0.8 $\pm$ 0.7  | 5.0 $\pm$ 0.9  | 5.0 $\pm$ 2.4  | 18.9 $\pm$ 0.3 |                |
|                                             |                                | HF                             | *                       | *              | *              | *              | *              | 2.7 $\pm$ 2.5  | 3.8 $\pm$ 0.1  | 13.9 $\pm$ 5.6 |                |
| Speyer 2.1<br>Loamy sand                    |                                | H                              |                         | *              | *              | *              | *              | 1.8 $\pm$ 0.4  | 1.7 $\pm$ 0.7  | 1.5 $\pm$ 0.1  |                |
|                                             |                                | HF                             | *                       | *              | *              | *              | *              | 1.4 $\pm$ 0.4  | 1.7 $\pm$ 0.5  | 2.4 $\pm$ 0.8  |                |
| Pavillion<br>Sandy loam                     |                                | H                              |                         | *              | *              | 1.5 $\pm$ 0.5  | 3.1 $\pm$ 1.1  | 2.7 $\pm$ 0.5  | 3.0 $\pm$ 3.2  | 8.9 $\pm$ 1.3  |                |
|                                             |                                | HF                             | *                       | *              | *              | 0.9 $\pm$ 0.7  | 2.4 $\pm$ 0.6  | 6.0 $\pm$ 0.5  | 5.1 $\pm$ 1.6  | 5.0 $\pm$ 1.0  |                |
